# Supplementary material for: Interplay between hypertriglyceridemia and acute promyelocytic leukemia mediated by the cooperation of peroxisome proliferator-activated receptor-α with the PML/RAR α fusion protein on super-enhancers
Source: PubMed Central journal article supplement — Haematologica. 2022 May 12;107(11):2589–600. doi: 10.3324/haematol.2021.280147 (PMC9614538; doi:10.3324/haematol.2021.280147), 2022-05-12
Supplement: 2021_280147_WU_SUPPL.pdf [file 2021_280147_WU_SUPPL.pdf]

# Interplay between hypertriglyceridemia and acute promyelocytic leukemia mediated by the cooperation of peroxisome proliferator-activated receptor- $\alpha$ with the PML/RAR $\alpha$ fusion protein on super-enhancers

Shishuang Wu,<sup>1\*</sup> Shufen Li,<sup>1\*</sup> Peng Jin,<sup>1\*</sup> Yi Zhang,<sup>1\*</sup> Li Chen,<sup>1</sup> Wen Jin,<sup>1,2</sup> Junmin Li<sup>1#</sup> and Kankan Wang<sup>1,2#</sup>

<sup>1</sup>Shanghai Institute of Hematology, State Key Laboratory of Medical Genomics, National Research Center for Translational Medicine at Shanghai, Ruijin Hospital Affiliated to Shanghai Jiao Tong University School of Medicine and <sup>2</sup>CNRS-LIA Hematology and Cancer, Sino-French Research Center for Life Sciences and Genomics, Ruijin Hospital Affiliated to Shanghai Jiao Tong University School of Medicine, Shanghai, China.

\*SW, SL, PJ and YZ contributed equally as co-first authors.

#JL and KW contributed equally as co-senior authors.

**Correspondence:** K. Wang  
[kankanwang@shsmu.edu.cn](mailto:kankanwang@shsmu.edu.cn)

**Received:** October 8, 2021.

**Accepted:** May 3, 2022.

**Prepublished:** May 12, 2022.

<https://doi.org/10.3324/haematol.2021.280147>

©2022 Ferrata Storti Foundation

Published under a CC BY-NC license

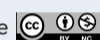

## **Supplementary Data**

### **Supplementary Methods**

### **Supplementary Figures**

Figure S1. Supporting data for the collaborative regulation of super-enhancers mediated by PPAR $\alpha$  and PML/RAR $\alpha$ .

Figure S2. Downregulation of target genes co-bound by PML/RAR $\alpha$  and PPAR $\alpha$  using the PPAR $\alpha$  inhibitor GW6471.

Figure S3. Inhibition of cell growth in NB4 cells using the PPAR $\alpha$  inhibitor GW6471.

Figure S4. Cell growth was increased upon the treatment of PPAR $\alpha$  activator GW7647.

### **Supplementary Tables**

Table S1. Primers used in this study

Table S2. Baseline characteristics of the APL patients having normal triglycerides and high triglycerides.

Table S3. RNA-seq patients' information.

Table S4. Super-enhancer associated genes co-bound by PPAR $\alpha$  and PML/RAR $\alpha$ .

Table S4 can be found in the accompanying Microsoft Excel file.

Table S5. OD values of NB4 cells treated with GW7647.

### **Supplementary References**

## **Supplementary Methods**

### **Cell lines and treatment**

NB4 cells were routinely cultured in RPMI-1640 (Gibco, Carlsbad, CA, USA) supplemented with 10% of fetal bovine serum (FBS) (Gibco). HEK-293T cells were cultured in Dulbecco's modified Eagle's medium (DMEM) (Gibco) with 10% of FBS (Gibco). All cell lines were maintained in a humidified atmosphere at 37°C with 5% CO<sub>2</sub>.

NB4 cells were treated with PPAR $\alpha$  antagonist GW6471 (Sigma, #G5045) at 5  $\mu$ M or 10  $\mu$ M. Five mg of GW6471 was dissolved in 806.9  $\mu$ L of DMSO to prepare a 10 mM of the stock solution.

NB4 cells were treated with PPAR $\alpha$  agonist GW7647 (Sigma, #G6793) at 0.5  $\mu$ M. Five mg of GW7647 was dissolved in 994.5  $\mu$ L of DMSO to prepare a 10 mM of the stock solution. Due to the high proliferation rate of cancer cells, NB4 cells were cultured under 5% of FBS upon the treatment of GW7647.

### **Treatment protocol for APL**

According to Sanz risk, newly diagnosed APL patients were divided into low risk (a WBC count  $\leq 10 \times 10^9/L$  and a platelet count  $> 40 \times 10^9/L$ ), intermediate risk (a WBC count  $\leq 10 \times 10^9/L$  and a platelet count  $\leq 40 \times 10^9/L$ ) and high risk (a WBC count  $> 10 \times 10^9/L$ ), respectively. They all received ATRA plus ATO-based induction therapy. ATRA (25 mg/m<sup>2</sup> per day) was given in an oral divided dose till CR and ATO was given intravenously at a dose of 0.16 mg/kg (10 mg maximum) per day till CR. Anthracycline (idarubicin or daunorubicin) was added to all high-risk patients and those intermediate risk patients experiencing leukocytosis during induction. Chemotherapy was not involved in low-risk patients, and hydroxyurea was applied to manage leukocytosis. After achieving complete remission with induction therapy, patients were randomized (1:1) into ATO and non-ATO groups for consolidation: ATRA-ATO versus ATRA-anthracycline for low-/intermediate-risk patients, or ATRA-ATO-anthracycline versus ATRA-anthracycline-cytarabine for high-risk patients. Patients with molecular complete response after consolidation therapy entered

maintenance therapy. Low- and intermediate-risk patients received three cycles of ATRA and ATO sequential treatment, while those of high-risk received five cycles of ATRA, ATO, and methotrexate treatment.

### **Antibodies**

The antibodies to detect PPAR $\alpha$  (Santa Cruz, #sc-398394), FLT3 (Cell Signaling, #3462S), phosphor-FLT3 (Tyr 589/591) (Cell Signaling, #3464S), STAT5 (Abcam, #ab32043), phospho-STAT5 (Y694) (Abcam, #ab32364), and GAPDH (Cell Signaling, #D16H11,) were used in western blotting experiments. PPAR $\alpha$  (Abcam, #ab227074) and IgG control antibody (Millipore, #12370 and #AP132) was used in CUT&Tag assays.

### **Inhibition of PPAR $\alpha$ with siRNAs or chemical inhibitors**

PPAR $\alpha$  gene expression in NB4 cells was silenced by the small interfering RNA (siRNA) technique. The siRNA was synthesized by Genepharma (shanghai, China). The sequence is siPPAR $\alpha$ -1: GUAGCGUAUGGAAAUGGGUUU; siPPAR $\alpha$ -2: GAACAGAAACAAAUGCCAGUA. According to the protocol of Nucleofector Kit V (Lonza, Cologne, Germany), NB4 cells were electrotransferred with siRNA in the Amaxa Nucleofector II device (Lonza, program X-001).

The PPAR $\alpha$  antagonist was GW6471, and the molecular weight was 619.67. A DMSO solvent with a final concentration of 5 - 10  $\mu$ M was used as a control.

### **Cleavage Under Targets and Tagmentation (CUT&Tag) followed by sequencing**

CUT&Tag assay was performed as described previously with modifications.<sup>1</sup> Briefly, 100000 cells were washed twice gently with wash buffer (20 mM HEPES pH 7.5; 150 mM NaCl; 0.5 mM Spermidine; 1 $\times$  Protease inhibitor cocktail). 10  $\mu$ L concanavalin A coated magnetic beads (Bangs Laboratories) were added per sample and incubated at RT for 10 min. Removed unbound supernatant and resuspended bead-bound cells with dig wash buffer (20 mM HEPES pH 7.5; 150 mM NaCl; 0.5 mM Spermidine; 1 $\times$  Protease inhibitor cocktail; 0.05% Digitonin; 2 mM EDTA). A 1:50 dilution of primary antibody or IgG control antibody was incubated on a rotating platform overnight at 4°C. The primary antibody was

removed using magnet stand. Secondary antibody (anti-Rabbit IgG antibody) was diluted 1:100 in dig wash buffer and cells were incubated at RT for 60 min. Cells were washed using the magnet stand 2-3 times in dig wash buffer. A 1:100 dilution of pA-Tn5 adapter complex was prepared in dig-med buffer (0.01% Digitonin; 20 mM HEPES pH 7.5; 300 mM NaCl; 0.5 mM Spermidine; 1× Protease inhibitor cocktail) and incubated with cells at RT for 1h. Cells were washed 2-3 times for 5 min in 1 mL Dig-med buffer. Then cells were resuspended in the tagmentation buffer (10 mM MgCl<sub>2</sub> in Dig-med Buffer) and incubated at 37°C for 1 h. DNA was purified using phenol-chloroform-isoamyl alcohol extraction and ethanol precipitation. To amplify libraries, 21 µL of DNA was mixed with 2 µL of a universal i5 and uniquely barcoded i7 primer. A volume of 25 µL NEBNext HiFi 2× PCR Master mix was added and mixed. The sample was placed in a Thermocycler with a heated lid using the following cycling conditions: 72°C for 5 min (gap filling); 98 °C for 30 s; 14 cycles of 98 °C for 10 s and 63 °C for 30 s; final extension at 72 °C for 1 min and hold at 8 °C. The library clean-up was performed XP beads (Beckman Counter). The size distribution of libraries was determined by Agilent 4200 TapeStation analysis, and libraries were mixed to achieve equal representation as desired aiming for a final concentration as recommended by the manufacturer. Sequencing was performed in the Illumina Novaseq 6000 using 150bp paired-end following the manufacturer's instructions.

### **Bioinformatic analysis for CUT&Tag-seq data and ChIP-seq data**

PML/RAR $\alpha$  ChIP-seq data for NB4 cells and H3K27ac ChIP-seq data for APL blasts were retrieved from our previous study, which are available at NCBI GEO under accession number GSE126720. All CUT&Tag-seq and ChIP-seq reads were aligned to the human genome (hg38) by Bowtie2 (version 2.2.9) under the following parameters -D 15 -R 2 -N 0 -L 22 -i S,1,1.15, and uniquely mapped reads were retained for further analyses. The sam files were converted to bam files and sorted with samtools. High-confident binding sites were called by MACS (version 1.4.2) with a *P*-value cutoff of 1e-10. The tdf file was generated by igvtools under the following parameters -z 5 -w 25 -e 250. The bedgraph files were generated by macs with the -B command. The overlap of peaks from different ChIP-

seq experiments was determined using the BEDTools2 suite.<sup>2</sup> For visualization, the binding of transcription factors and histone modifications were plotted by the UCSC Genome Browser (<https://genome.ucsc.edu/>) using the bedGraph files generated by MACS (version 1.4.2). Heat maps for PPAR $\alpha$  and PML/RAR $\alpha$  binding sites were generated by the bigWigSummary function from the UCSC database. Super-enhancers in APL blasts were identified using the ROSE algorithm.<sup>3</sup> In brief, constituent enhancers were calculated by merging individual enhancers according to H3K27ac ChIP-seq signals called by MACS (version 1.4.2) within 12.5 kb. The normalized ChIP-seq signals of H3K27ac in these constituent enhancers were ranked. To distinguish super-enhancers from typical enhancers, a cutoff was set as previously described.<sup>3</sup> ChIPseeker (v1.14.0) and R (3.4.1) were used for peak annotation to obtain target genes. The closest genes nearby PPAR $\alpha$  bound super-enhancers were defined as the super-enhancer-associated PPAR $\alpha$ -regulated targets, as previously described.<sup>3</sup> According to the KEGG database, pathway analysis was used to determine the genes' significant pathways near PPAR $\alpha$ +PML/RAR $\alpha$ +SEs co-bound regions. We used the Fisher's exact test to select the significant pathways, and the threshold of significance was defined by *P*-value and FDR.<sup>4</sup>

### **RNA extraction, reverse transcription, and RT-qPCR**

Total RNA was extracted using the TRIzol reagent (Invitrogen, Carlsbad, CA, USA) according to the manufacturer's instructions. Then 1  $\mu$ g of total RNA was reverse transcribed into cDNA using the PrimeScript™ RT reagent Kit with gDNA Eraser (Perfect Real Time) (RR047A, Takara). RT-qPCR was conducted using the TB Green® Premix Ex Taq™ (Tli RNaseH Plus) on the ABI ViiA 7 Real-Time PCR System. The relative expression level of each gene was calculated as  $2^{-\Delta\Delta Ct}$ , GAPDH was used as an internal control. Primers used in this study are listed in Table S4.

### **RNA-sequencing (RNA-seq) and data analysis**

RNA-seq libraries were constructed according to the manufacture's instruction using the TruSeq RNA Sample Preparation Kit v2 (Illumina). About 1  $\mu$ g of total RNA was used and polyA-tailed mRNAs were purified from total RNA using oligo-dT attached magnetic beads.

The purified library was quantified using a Qubit 4 Fluorometer. High-throughput sequencing (150-bp paired-end reads) was done on the Illumina HiSeq 2500 or NovaSeq 6000 platform. Trim-galore was employed to remove the adapter sequences, and then the clean reads were aligned with STAR (v2.7.8) and quantified with HT-Seq (v0.13.5) using the GRCh38 human assembly. The differential expression assessment was conducted using the DESeq2 package.  $|\log_2(\text{fold change})| \geq 1$  and  $\text{FDR} < 0.05$  were used for determining differentially expressed genes (DEGs). Gene expression levels were normalized to Transcripts Per Kilobase of exon model per Million mapped reads (TPM) using a custom script. To associate each binding peak (ChIP-seq) with the most likely regulated target gene (RNA-seq), we first extracted all differentially expressed genes (between APL with a high level of triglyceride and APL with a normal level of triglyceride) that located from 50 Kb upstream or downstream of the peak. The nearest gene to the peak was chosen as the potential target if multiple genes were found.

### **Gene set variation analysis (GSVA) and the gene set enrichment analysis (GSEA) analysis**

GSVA, a popular framework for condensing information from gene expression profiles into a pathway or signature summary, was used to estimate the pathway activity of KEGG pathway signatures in each APL patient. The KEGG pathway gene sets were obtained from Molecular signatures database (MSigDB). A two-class comparison of GSVA scores of APL patients with high triglyceride levels ( $n=20$ ) and the paired patients with normal triglyceride levels ( $n=20$ ) was performed using the `lmFit` and `eBayes` functions implemented in the `limma` R package. Briefly, `lmFit` was used to fit a linear model to the GSVA scores divided in the high triglyceride- and normal triglyceride-group. Then, `eBayes` was used to compute t-statistics and log-odds ratios of differential pathway scores. Two-sided  $P$  values were corrected for multiple hypothesis testing using the Benjamini-Hochberg correction. Pathways with significantly normal/higher GSVA scores in APL patients with high triglyceride levels ( $q\text{-value} < 0.3$ ) compared to those with normal triglyceride levels were identified as candidates for in-depth analysis. The DEGs between the two APL patient groups were used as input for GSEA implemented in the `clusterProfiler`

R package.

### **Western blotting**

Cells were washed with PBS and lysed in RIPA lysis buffer (Beyotime Biotechnology, #P0013B) with 100  $\mu$ M PMSF (Sigma) and 100  $\mu$ M cocktail (Sigma) for 30 min; then lysates were obtained by sonication and centrifugation. Next, total protein was quantified using Bio-Rad DC Protein Assay (Bio-Rad, Hercules, CA, USA, #5000116) according to the manufacturer's instruction and diluted into 1  $\mu$ g/ $\mu$ L using the RIPA lysis buffer and 5  $\times$  SDS-PAGE protein loading buffer (Beyotime Biotechnology, #P0015L). All the above steps were performed at 4  $^{\circ}$ C. Diluted protein samples were heated 100  $^{\circ}$ C for 10 min. Then 10  $\mu$ g of total protein/sample was loaded and separated on 10% acrylamide tris-HCL-buffered SDS-PAGE gels (EpiZyme, Shanghai, China, #PG112), transferred to polyvinylidene difluoride membranes (GE Healthcare, Piscataway, NJ, USA, #RPN303F), immunoblotted with indicated antibodies, and imaged using Immobilon Western Chemiluminescent HRP Substrate (Millipore, #WBKLS0500) on an image-quant LAS4000 (Fujifilm Life Science) or Amersham Imager 600 Luminescent Image analyzer (GE Healthcare Bio-Sciences).

### **Proliferation Assays**

Cells were seeded at the concentration of 2000/well in a 96-wells plate. According to the manufacturer's instruction, cell proliferation was measured every 24 hours using Cell Counting Kit-8 (Dojindo, Tokyo, Japan, #CK04). All experiments were conducted in six-replicate.

### **Animal study**

FVB/NJ mice were bred and housed in the animal facility of Ruijin hospital. The 6–8-week-old littermates had an initial body weight of about  $22 \pm 2$  g. The mice were divided into two groups, 8-10 in each group. The mice were fed a high-fat diet (HFD, 60% fat) or a normal diet (ND). The mice in each group were fed and drank freely. Mice weights were recorded weekly. After six weeks, triglycerides (TG) were measured in mice to see if the high triglyceride model was successfully constructed. Lipid profile measurement was performed



according to the instructions of the lipid profile kit (KHB 146-V3.0-xx). The bone marrow cells were isolated from the femur and tibia of transplantable APL-onset mice carrying the PML/RAR $\alpha$  transgene. Each mouse could obtain  $1 \times 10^5$  of APL bone marrow cells. Cells were resuspended in 100-200  $\mu$ L of DMEM and injected into mice by tail vein injection. Collected blood from the tail vein of each mouse on days 6, 13, and 17. Flow cytometry was used to detect the GFP positive rate (leukemia cells carried PML/RAR $\alpha$ -GFP) to observe mice's pathogenesis dynamically.

### **Statistical analysis**

Linear mixed-effect models were used to examine the relationship between triglycerides and white blood cell counts. The two-sided t-test was used to compare the measurements of the two groups. One-way ANOVA was used to compare multiple groups (simultaneous test for variance homogeneity). When comparing the cross-table data, the chi-square test was used to detect the statistical differences. When analyzing the differences in the data components of the 3x2 table, such as comparing the difference of risk level distribution in APL patients with normal or high triglyceride levels, the chi-square test with the Bonferroni correction was used. We used the Kaplan–Meier method to calculate whether the statistical difference between the two groups was significant for survival data. Binary logistic regression analysis was used to establish a model, and related variables were diagnosed by collinearity. The Delong test was used to compare the ROC curve areas and evaluate the models' performance. When the *P* value was less than 0.05, the difference was considered statistically significant. The Wilcoxon rank-sum test was used to assess the statistical significance of differences between two groups, and p-value < 0.05 indicated significant differences.

## Supplementary Figures

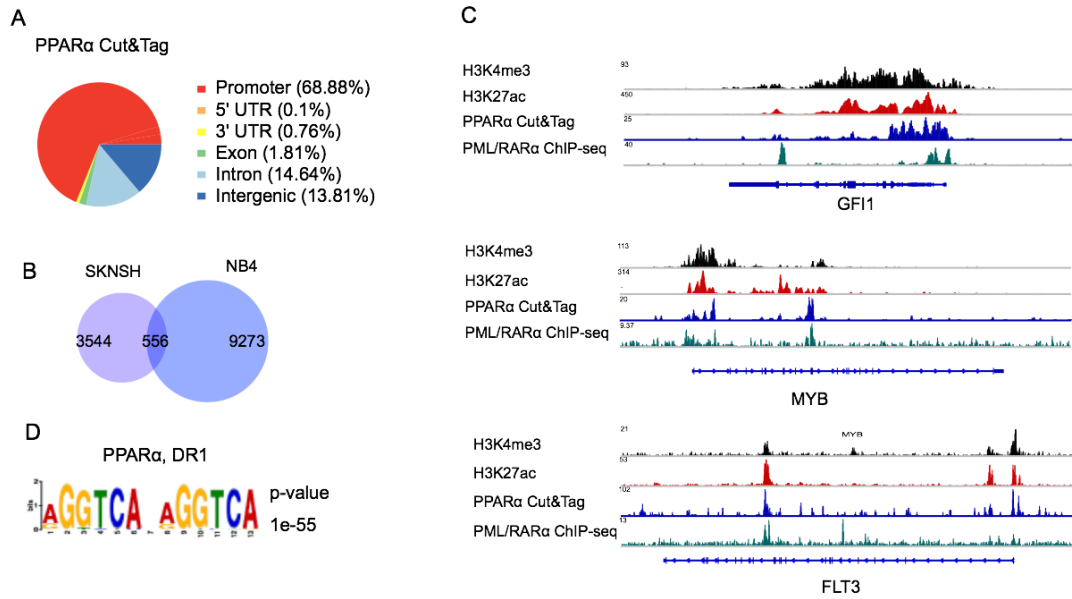

**Figure S1. Supporting data for the collaborative regulation of super-enhancers mediated by PPAR $\alpha$  and PML/RAR $\alpha$ .**

(A) Pie chart showing the distribution of 9,829 PPAR $\alpha$  peaks in NB4 cells. UTR, untranslated region. (B) Schematic illustration of the comparison between PPAR $\alpha$  binding sites in NB4 and SKNSH cells. (C) Genome browser view of H3K4me3, H3K27ac, PPAR $\alpha$ , and PML/RAR $\alpha$  co-binding at representative target genes in NB4 cells. (D) Motif discovery of PPAR $\alpha$  Cut&Tag regions by directly scanning PPRES using AME algorithm.

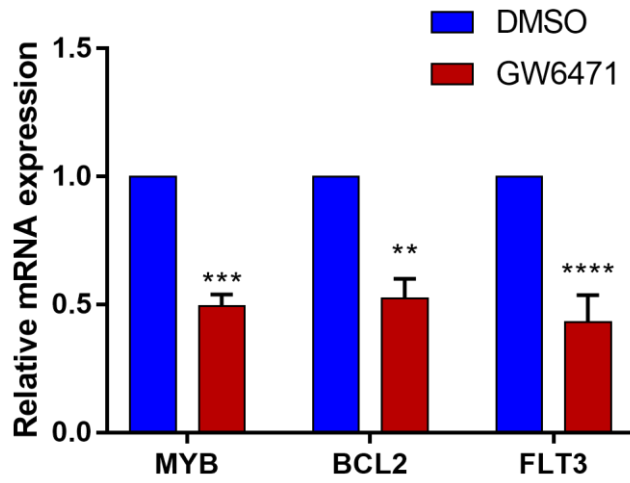

Figure S2. Downregulation of target genes co-bound by PML/RAR $\alpha$  and PPAR $\alpha$  using the PPAR $\alpha$  inhibitor GW6471.

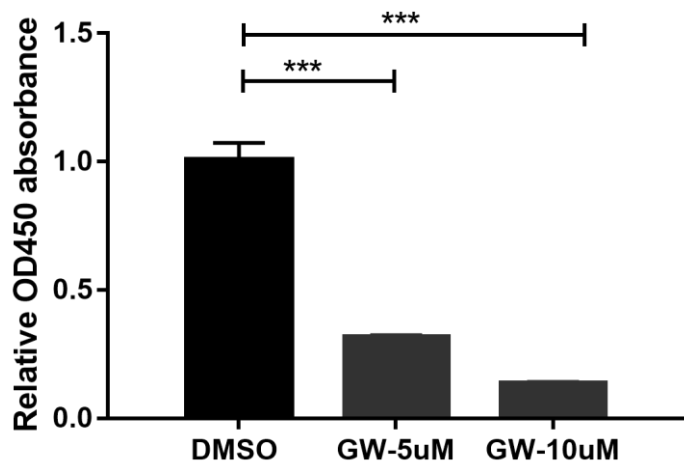

Figure S3. Inhibition of cell growth in NB4 cells using the PPAR $\alpha$  inhibitor GW6471.

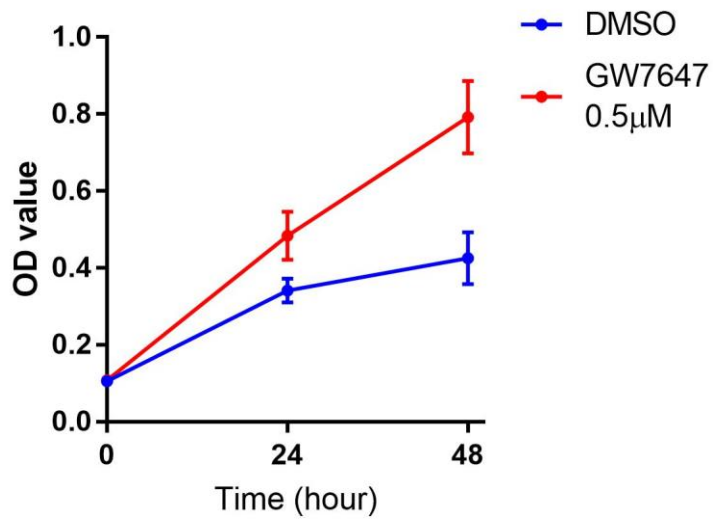

**Figure S4. Cell growth was increased upon the treatment of PPAR $\alpha$  activator GW7647. NB4 cells were cultured under 5% of FBS upon the treatment of GW7647.**

**Table S1. Primers used in this study**

| Name              | Sequence                 |
|-------------------|--------------------------|
| mGAPDH-F          | GGCAAATTC AACGGCACAGT    |
| mGAPDH-R          | CGCTCCTGGAAGATGGTGAT     |
| mFLT3-F           | GAGCGACTCCAGCTACGTC      |
| mFLT3-R           | ACCCAGTGAAAATATCTCCCAGA  |
| mPPAR $\alpha$ -F | TGCAAACCTTGGACTTGAACG    |
| mPPAR $\alpha$ -R | GATCAGCATCCCGTCTTTGT     |
| hGAPDH-F          | GGAGCGAGATCCCTCCAAAAT    |
| hGAPDH-R          | GGCTGTTGTCATACTTCTCATGG  |
| hPPAR $\alpha$ -F | CCAGTATTTAGGAAGCTGTCC    |
| hPPAR $\alpha$ -R | TGAAAGCGTGTCGGTGAT       |
| hFLT3-F           | AGGGACAGTGTACGAAGCTG     |
| hFLT3-R           | GCTGTGCTTAAAGACCCAGAG    |
| hSTAT5A-F         | CGAGTGCAGTGGTGAGATCC     |
| hSTAT5A-R         | TCCTCTGTCACGGACTCTGC     |
| hMYB-F            | AAGGTCGAACAGGAAGGTTATC   |
| hMYB-R            | ACTGTTCTTCTGGAAGCTTGT    |
| hBCL2-F           | TGTGGATGACTGAGTACCTGAACC |
| hBCL2-R           | GGAGAAATCAAACAGAGGCCGCAT |

**Table S2. Baseline characteristics of the APL patients having normal triglycerides and high triglycerides.**

|                          | Normal TG         |           | High TG          |           | <i>P</i> * |
|--------------------------|-------------------|-----------|------------------|-----------|------------|
|                          | Median (IQR)      | N (%)     | Median (IQR)     | N (%)     |            |
| All patients             |                   | 73 (100)  |                  | 116 (100) |            |
| Age at diagnosis, y      | 36.0 (26.5-47.5)  |           | 37 (30.8-48)     |           |            |
| ≤ 40                     | -                 | 40 (54.8) | -                | 64 (55.2) | 0.182      |
| > 40                     | -                 | 33 (45.2) | -                | 52 (44.8) |            |
| Sex                      |                   |           |                  |           | 0.009      |
| Male                     | -                 | 26 (35.6) | -                | 64 (55.2) |            |
| Female                   | -                 | 47 (64.4) | -                | 52 (44.8) |            |
| WBC                      | 3.5 (1.5-7.5)     |           | 5.0 (2.0-17.2)   |           | 0.009**    |
| ≤ 10 ×10 <sup>9</sup> /L | -                 | 60 (82.2) | -                | 81 (69.8) |            |
| > 10 ×10 <sup>9</sup> /L | -                 | 13 (17.8) | -                | 35 (30.2) |            |
| Platelets                | 61.0 (25.8-130.5) |           | 43.0 (21.0-92.3) |           | 0.222      |
| ≤ 40×10 <sup>9</sup> /L  | -                 | 28 (38.4) | -                | 55 (47.4) |            |
| > 40×10 <sup>9</sup> /L  | -                 | 45 (61.6) | -                | 61 (52.6) |            |
| Sanz risk score          |                   |           |                  |           | 0.219      |
| Low                      | -                 | 25 (34.2) | -                | 27 (23.2) |            |
| Intermediate             | -                 | 30 (41.4) | -                | 51 (44.0) |            |
| High                     | -                 | 18 (24.7) | -                | 38 (32.8) |            |
| Differentiation syndrome | -                 | 12 (16.4) | -                | 19 (16.3) | 0.536      |
| Early death              | -                 | 1 (1.4)   | -                | 12 (10.3) | 0.018      |

"-" indicates not applicable. \*X<sup>2</sup> test compared distributions among TG groups. \*\* t-test was performed between the 2 groups. TG, triglycerides. There were no statistical differences between the two groups in treatment, supportive care, and time-to-treatment initiation.

**Table S3. RNA-seq patients' information.**

| Patient ID | Group     | Sex    | Age | Risk level   | WBC   | PLT | PML/RAR $\alpha$ transcript type |
|------------|-----------|--------|-----|--------------|-------|-----|----------------------------------|
| Pt01       | Normal_TG | Female | 36  | High         | 19.1  | 59  | L-type                           |
| Pt02       | Normal_TG | Female | 28  | Low          | 5.4   | 228 | S-type                           |
| Pt03       | Normal_TG | Female | 46  | High         | 1.8   | 77  | L-type                           |
| Pt04       | Normal_TG | Male   | 21  | Low          | 1.63  | 79  | L-type                           |
| Pt05       | Normal_TG | Female | 49  | High         | 16    | 22  | L-type                           |
| Pt06       | Normal_TG | Male   | 53  | Low          | 1     | 158 | S-type                           |
| Pt07       | Normal_TG | Female | 49  | Intermediate | 4.6   | 129 | L-type                           |
| Pt08       | Normal_TG | Male   | 21  | Intermediate | 6.7   | 170 | L-type                           |
| Pt09       | Normal_TG | Male   | 63  | Intermediate | 7.4   | 194 | S-type                           |
| Pt10       | Normal_TG | Female | 21  | Intermediate | 6.7   | 159 | L-type                           |
| Pt11       | Normal_TG | Female | 25  | Intermediate | NA    | NA  | S-type                           |
| Pt12       | Normal_TG | Female | 31  | Low          | 15.67 | 72  | L-type                           |
| Pt13       | Normal_TG | Male   | 26  | Low          | 3.26  | 72  | S-type                           |
| Pt14       | Normal_TG | Female | 21  | Low          | 1.57  | 60  | S-type                           |
| Pt15       | Normal_TG | Male   | 44  | Intermediate | 1.89  | 29  | L-type                           |
| Pt16       | Normal_TG | Male   | 20  | Intermediate | 3.3   | 149 | L-type                           |
| Pt17       | Normal_TG | Female | 42  | Low          | 1.16  | 43  | L-type                           |
| Pt18       | Normal_TG | Female | 54  | Intermediate | 0.75  | 32  | L-type                           |
| Pt19       | Normal_TG | Female | 43  | Intermediate | 7.5   | 119 | L-type                           |
| Pt20       | Normal_TG | Male   | 27  | Intermediate | 0.83  | 3   | L-type                           |
| Pt21       | High_TG   | Female | 35  | High         | 6.02  | 207 | L-type                           |
| Pt22       | High_TG   | Male   | 52  | High         | 5.1   | 153 | S-type                           |
| Pt23       | High_TG   | Male   | 46  | High         | 89    | 22  | S-type                           |
| Pt24       | High_TG   | Male   | 31  | High         | 133.8 | 10  | S-type                           |
| Pt25       | High_TG   | Female | 27  | Intermediate | 6.9   | 244 | S-type                           |
| Pt26       | High_TG   | Female | 32  | Low          | 3     | 90  | L-type                           |
| Pt27       | High_TG   | Male   | 55  | Intermediate | 3.6   | 183 | L-type                           |
| Pt28       | High_TG   | Male   | 45  | Intermediate | 3.23  | 2   | L-type                           |
| Pt29       | High_TG   | Female | 64  | Low          | NA    | NA  | S-type                           |
| Pt30       | High_TG   | Female | 39  | Intermediate | 1.26  | 9   | L-type                           |
| Pt31       | High_TG   | Male   | 30  | Intermediate | 14.2  | 97  | L-type                           |
| Pt32       | High_TG   | Male   | 37  | Low          | 2.4   | 56  | L-type                           |
| Pt33       | High_TG   | Female | 34  | Intermediate | 4.18  | 4   | L-type                           |
| Pt34       | High_TG   | Female | 27  | Intermediate | 6.6   | 7   | S-type                           |
| Pt35       | High_TG   | Male   | 54  | Low          | 1.39  | 93  | L-type                           |
| Pt36       | High_TG   | Female | 48  | Intermediate | 0.84  | 77  | L-type                           |
| Pt37       | High_TG   | Male   | 33  | Intermediate | 5.3   | 225 | L-type                           |
| Pt38       | High_TG   | Male   | 29  | Intermediate | 3.6   | 7   | S-type                           |
| Pt39       | High_TG   | Male   | 50  | Low          | 15    | 134 | L-type                           |
| Pt40       | High_TG   | Female | 33  | Low          | 0.5   | 43  | V-type                           |

TG, triglycerides



**Table S4. Super-enhancer associated genes co-bound by PPAR $\alpha$  and PML/RAR $\alpha$ .**

Table S4 can be found in the accompanying Microsoft Excel file.

**Table S5. OD values of NB4 cells treated with GW7647**

| Batch Number | Time<br>(hour) | DMSO     |          |          | GW7647   |          |          |
|--------------|----------------|----------|----------|----------|----------|----------|----------|
|              |                | well 1   | well 2   | well 3   | well 1   | well 2   | well 3   |
| NO.1         | 0              | 0.106219 | 0.108182 | 0.104951 | 0.114309 | 0.105728 | 0.103331 |
|              | 24             | 0.362222 | 0.350107 | 0.369361 | 0.422196 | 0.548603 | 0.531857 |
|              | 48             | 0.449391 | 0.422263 | 0.451657 | 0.746224 | 0.863969 | 0.855373 |
| NO. 2        | 0              | 0.104358 | 0.105255 | 0.104888 | 0.106487 | 0.104976 | 0.110888 |
|              | 24             | 0.351326 | 0.330768 | 0.284784 | 0.514900 | 0.492744 | 0.392524 |
|              | 48             | 0.518922 | 0.393908 | 0.315900 | 0.884464 | 0.766822 | 0.636208 |
| NO.3         | 0              | 0.102851 | 0.102764 | 0.103489 | 0.103920 | 0.106660 | 0.103963 |
|              | 24             | 0.378144 | 0.382101 | 0.409754 | 0.436997 | 0.549583 | 0.360702 |
|              | 48             | 0.447968 | 0.408870 | 0.409754 | 0.710064 | 0.725402 | 0.786295 |

NB4 cells were cultured with 1640 containing 5% FBS. NB4 cells were treated with PPAR $\alpha$  agonist GW7647 at 0.5  $\mu$ M. DMSO served as control.

### Supplementary References

1. Kaya-Okur HS, Wu SJ, Codomo CA, et al. CUT&Tag for efficient epigenomic profiling of small samples and single cells. *Nat Commun.* 2019;10(1):1930.
2. Quinlan AR, Hall IM. BEDTools: a flexible suite of utilities for comparing genomic features. *Bioinformatics.* 2010;26(6):841-842.
3. Loven J, Hoke HA, Lin CY, et al. Selective inhibition of tumor oncogenes by disruption of super-enhancers. *Cell.* 2013;153(2):320-334.
4. Draghici S, Khatri P, Tarca AL, et al. A systems biology approach for pathway level analysis. *Genome Res.* 2007;17(10):1537-1545.
